# Supplementary material for: Precise stepwise recovery of platinum group metals from high-level liquid wastes based on SDB polymer-modified SiO2
Source: Royal Society of Chemistry journal article supplement (doi:10.1039/d3dt03469k), 2023-12-13
Supplement: d3dt03469k1.pdf [file d3dt03469k1.pdf]

1 **Precise stepwise recovery of platinum group metals from high level liquid waste**  
2 **based on SDB polymer modified SiO<sub>2</sub>**

3 Kun Wu <sup>a</sup>, Shunyan Ning <sup>b,\*</sup>, Xiangbiao Yin <sup>b,\*</sup>, Sizhi Xu <sup>a</sup>, Yilai Zhong <sup>a</sup>, Zengyuan Li <sup>a</sup>,  
4 Lifeng Chen <sup>b</sup>, Mohammed F. Hamza <sup>b</sup>, Toyohisa Fujita <sup>a</sup>, Yuezhou Wei <sup>b,c</sup>

5 *<sup>a</sup>State Key Laboratory of Featured Metal Materials and Life-cycle Safety for Composite Structures,*  
6 *MOE Key Laboratory of New Processing Technology for Nonferrous Metals and Materials, and*  
7 *School of Resources, Environment and Materials, Guangxi University, Nanning 530004, China.*

8 *<sup>b</sup>School of Nuclear Science and Technology, University of South China, 28 Changsheng West*  
9 *Road, Hengyang 421001, P.R. China.*

10 *<sup>c</sup>School of Nuclear Science and Engineering, Shanghai Jiao Tong University, 800 Dong Chuan*  
11 *Road, Shanghai 200240, China.*

12 \*Corresponding author: Shunyan Ning

13 E-mail: [ningshunyan@usc.edu.cn](mailto:ningshunyan@usc.edu.cn)

14 Address: School of Nuclear Science and Technology, University of South China, 28  
15 Changsheng West Road, Hengyang 421001, P.R. China.

16 ORCID: 0000-0002-9573-5960

17 \*Corresponding author: Xiangbiao Yin

18 Email: [yinxb@usc.edu.cn](mailto:yinxb@usc.edu.cn)

19 Address: School of Nuclear Science and Technology, University of South China, 28  
20 Changsheng West Road, Hengyang 421001, PR China.

21 ORCID: 0000-0003-2319-1789

22 **3.2.1. Effects of HNO<sub>3</sub> concentration and temperature**

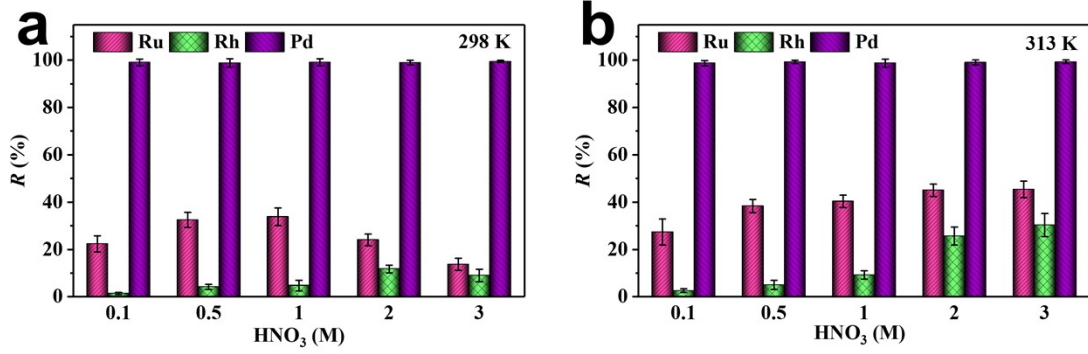

23

24 **Fig. S1.** Effect of HNO<sub>3</sub> concentrations on the adsorption of PGMs by dNbpy/SiO<sub>2</sub>-P at 298 K (a), 313

25 K (b) ( $m/V = 0.02$  g/mL,  $C_0$ : 1 mM,  $t = 24$  h).

### 26 3.2.2 Kinetics study

Pseudo-first-order kinetics model:  $\ln(Q_e - Q_t) = \ln Q_e - k_1 t$  (S1)

Pseudo-second-order kinetics model:  $\frac{t}{Q_t} = \left(\frac{1}{Q_e}\right)t + \frac{1}{k_2 Q_e^2}$  (S2)

27 Where  $k_1$  (h<sup>-1</sup>) and  $k_2$  (mg·g<sup>-1</sup>·h<sup>-1</sup>) are the adsorption rate constants of pseudo-first-  
 28 order kinetics model and pseudo-second-order kinetics model, the equilibrium  
 29 adsorption capacity and the adsorption quantity at time  $t$  (min), respectively, are  $Q_e$   
 30 (mg·g<sup>-1</sup>) and  $Q_t$  (mg·g<sup>-1</sup>).

31 In this work, both pseudo-first-order kinetics model and pseudo-second-order  
 32 kinetic model were applied to analyze the experimental data.

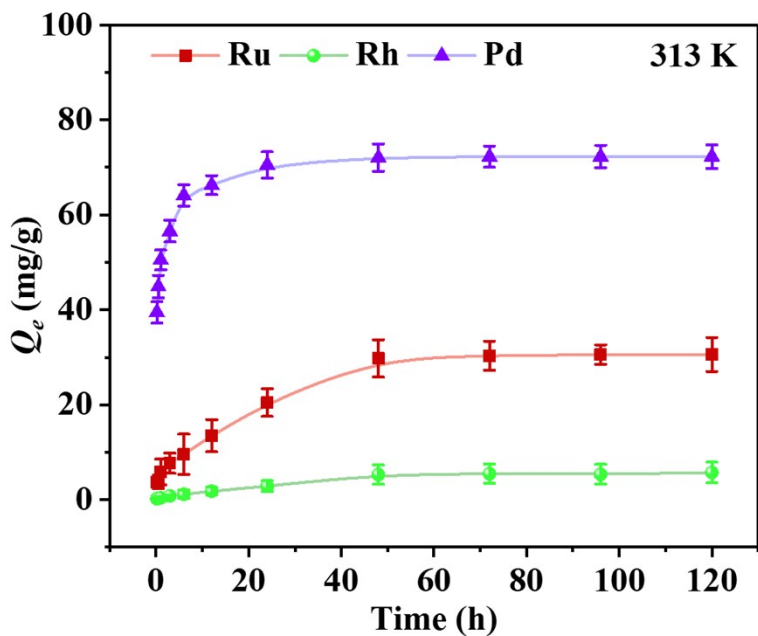

33

34 **Fig. S2.** Adsorption kinetics of PGMs on dNbpy/SiO<sub>2</sub>-P at 313 K ( $m/V = 0.02$  g/mL,  $C_{\text{Ru(III)}}: 10$  mM,

35  $C_{\text{Rh(III)}}: 5$  mM,  $C_{\text{Pd(II)}}: 20$  mM,  $C_{\text{HNO}_3}: 3$  mol/L).

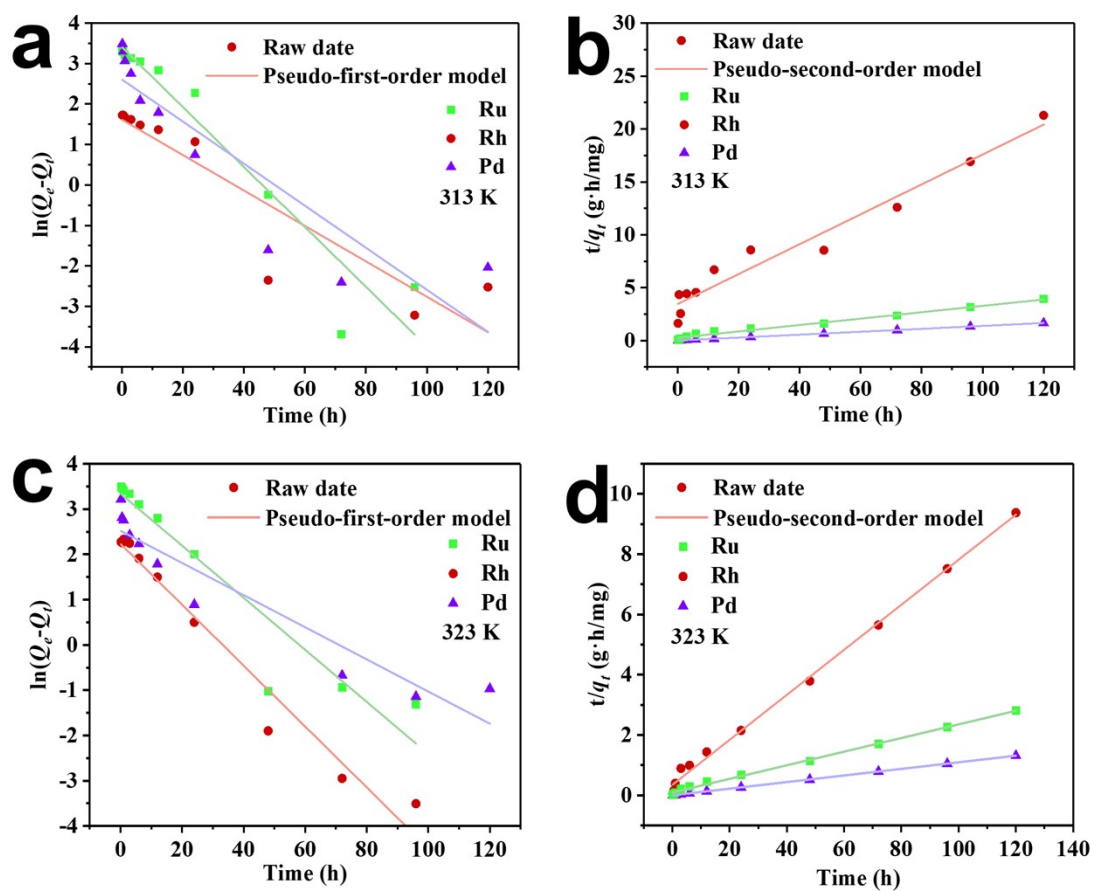

36

37 **Fig. S3.** Adsorption kinetics fitting results of PGMs on dNbpy/SiO<sub>2</sub>-P at 313 K (a, b) and 323 K (c, d)

38 ( $m/V = 0.02$  g/mL,  $C_{\text{Ru(III)}} = 10$  mM,  $C_{\text{Rh(III)}} = 5$  mM,  $C_{\text{Pd(II)}} = 20$  mM,  $C_{\text{HNO}_3} = 3$  mol/L).

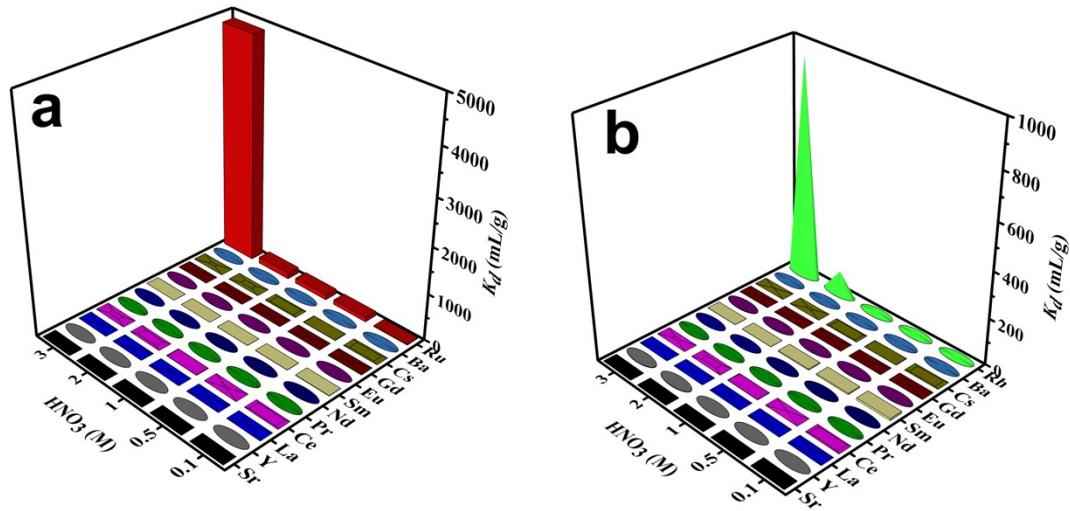

39

40

Fig. S4. Ru(III) (a) and Rh(III) (b) distribution coefficients.

41 **Table S1**  $SF$  data for PGMs.

| $\text{HNO}_3/\text{M}$ | $SF_{\text{Ru/M}}$ | $SF_{\text{Rh/M}}$ | $SF_{\text{Pd/M}}$ |
|-------------------------|--------------------|--------------------|--------------------|
| 0.1                     | 33                 | 4                  | 543                |
| 0.5                     | 170                | 9                  | 930                |
| 1                       | 188                | 59                 | 1412               |
| 2                       | 230                | 74                 | 3716               |
| 3                       | 1705               | 336                | 3805               |

### 42 3.2.3. Isotherm study

$$\text{Langmuir model: } Q_e = \frac{q_m \times K_L \times C_e}{1 + K_L \times C_e} \quad (\text{S3})$$

$$\text{Freundlich model: } Q_e = K_F \times C_e^{\frac{1}{n}} \quad (\text{S4})$$

43 where  $Q_e$  ( $\text{mg} \cdot \text{g}^{-1}$ ) and  $q_m$  ( $\text{mg} \cdot \text{g}^{-1}$ ) are the equilibrium and computed maximum

44 adsorption capacities.  $C_e$  ( $\text{mmol} \cdot \text{L}^{-1}$ ) stands for equilibrium ions concentration. The

45 constants in the Langmuir and Freundlich isotherm are  $K_L$  ( $\text{L} \cdot \text{mg}^{-1}$ ) and  $K_F$  ( $\text{mg}^{1-n} \cdot \text{L}^n/\text{g}$ ).

46 Adsorption intensity is expressed as  $n$ .

47 Langmuir model (**Eq. S4**) assumes the process is single layer adsorption that all

48 the sites are evenly distributed and have the same adsorption ability. Freundlich model  
 49 (Eq. S5) assumes a heterogeneous adsorption surface with sites having different  
 50 adsorption energies.

### 51 3.2.4. Thermodynamic analysis

$$\text{Van't Hoff equation: } \ln K_d = \frac{-\Delta H_o}{RT} + \frac{\Delta S_o}{R} \quad (\text{S5})$$

$$\text{Gibbs-Helmholtz equation: } \Delta G_o = \Delta H_o - \Delta S_o T \quad (\text{S6})$$

52 where  $\Delta G^o$ ,  $\Delta H^o$ , and  $\Delta S^o$  are the changes in Gibbs free energy (kJ/mol), enthalpy  
 53 (kJ/mol), entropy (kJ/K·mol), respectively.  $R$  is the universal gas constant 8.314  
 54 J/(K·mol) and  $K_d$  (mL/g) is the distribution coefficient.  $\Delta S^o$ ,  $\Delta H^o$  are obtained according  
 55 to the intercept and slope of Eq. S6 ( $\ln K_d$  versus  $1/T$ ), while then  $\Delta G^o$  at different  
 56 temperature can be obtained according to Eq. S7.

### 57 3.3.3 Slope analysis

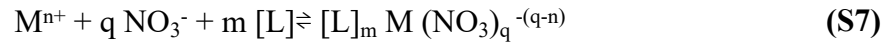

$$\text{Partition coefficient: } D = \frac{C_1}{C_a} = \frac{(C_2 - C_a)}{C_a} \times \frac{V_a}{V_1} = \frac{[\text{L}]_m \cdot \text{M} (\text{NO}_3^-)_q}{\text{Mn}^{n+}} \quad (\text{S8})$$

$$\text{Extraction equilibrium constant: } K' = \frac{[\text{L}]_m \cdot \text{M} (\text{NO}_3^-)_q}{\text{Mn}^{n+} [\text{L}]_m (\text{NO}_3^-)_q} \quad (\text{S9})$$

$$\text{Slope analysis equation: } \log D = \log K' + q \log [\text{NO}_3^-] + m \log [\text{L}] \quad (\text{S10})$$

58 Partition coefficient  $D$  was calculated using Eq. S9.  $C_1$ ,  $C_2$ , and  $C_a$  represent the  
 59 cation concentrations in the loaded oil phase, the initial aqueous phase before  
 60 extraction, and the aqueous phase after extraction.  $V_a$  and  $V_1$  denote the volumes of the  
 61 aqueous and organic phases of the extraction experiment. Where  $\text{M}^{n+}$  represents the Ru,

62 Rh, and Pd, [L] represents  $dN_{\text{bpy}}$ ,  $m$  denotes the stoichiometric coefficient.  $\log D$  can  
 63 be transformed from Eq. S9 and Eq. S10 to Eq. 11.

### 64 3.3.4 Depth-profiling XPS analysis

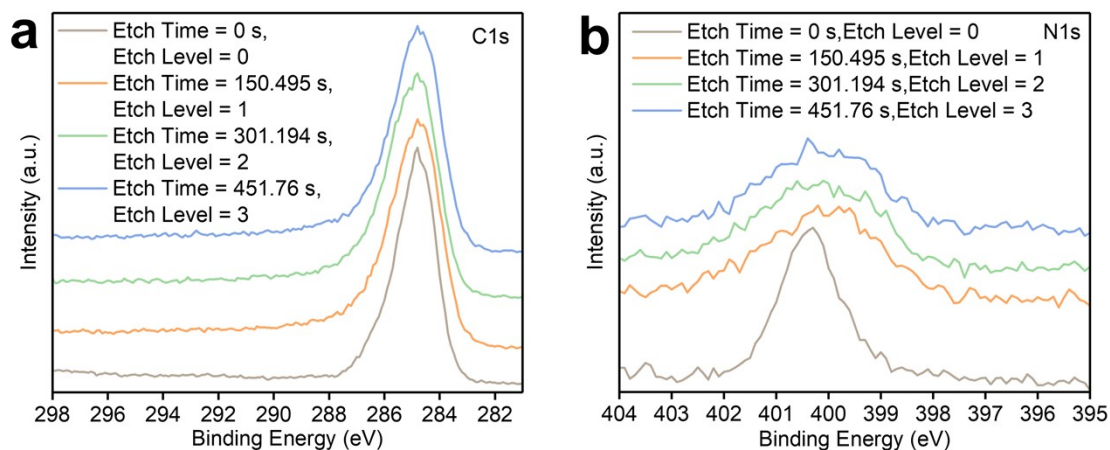

65

66

**Fig. S5.** Fine spectra of depth-profiling XPS etched C 1s (a), N 1s (b).

### 67 3.4. Column experiments

68 **Table S2** Recovery yields of metal ions in the column experiment (a).

| Elements | I (%) | II (%) | III (%) | IV (%) | Total (%) |
|----------|-------|--------|---------|--------|-----------|
| Ru       | 0.00  | 99.57  | 0.00    | 0.10   | 99.67     |
| Rh       | 0.00  | 99.83  | 0.00    | 0.07   | 99.9      |
| Pd       | 0.00  | 0.08   | 0.03    | 99.58  | 99.69     |
| Sr       | 0.00  | 99.99  | 0.00    | 0.00   | 99.99     |
| Y        | 0.00  | 99.95  | 0.00    | 0.00   | 99.95     |
| Cs       | 0.00  | 98.17  | 0.00    | 0.12   | 98.17     |
| Ba       | 0.00  | 99.99  | 0.00    | 0.00   | 99.99     |
| La       | 0.00  | 99.96  | 0.00    | 0.00   | 99.96     |
| Ce       | 0.00  | 99.97  | 0.00    | 0.00   | 99.97     |
| Pr       | 0.00  | 99.86  | 0.00    | 0.00   | 99.86     |
| Nd       | 0.00  | 99.93  | 0.00    | 0.00   | 99.93     |
| Sm       | 0.00  | 99.79  | 0.00    | 0.35   | 99.79     |
| Eu       | 0.00  | 99.99  | 0.00    | 0.00   | 99.99     |

|    |      |       |      |      |       |
|----|------|-------|------|------|-------|
| Gd | 0.00 | 99.87 | 0.00 | 0.00 | 99.87 |
|----|------|-------|------|------|-------|

---

69 **Table S3** Recovery yields of metal ions in the column experiment (b).

| Elements | I (%) | II (%) | III (%) | IV (%) | Total (%) |
|----------|-------|--------|---------|--------|-----------|
| Ru       | 0.00  | 9.43   | 0.00    | 90.35  | 99.78     |
| Rh       | 0.00  | 60.92  | 0.00    | 15.37  | 76.29     |
| Pd       | 0.00  | 0.00   | 0.00    | 0.00   | 0.00      |
| Sr       | 0.00  | 99.32  | 0.00    | 0.07   | 99.39     |
| Y        | 0.00  | 99.53  | 0.00    | 0.10   | 99.63     |
| Cs       | 0.00  | 99.75  | 0.00    | 0.23   | 99.98     |
| Ba       | 0.00  | 99.92  | 0.00    | 0.00   | 99.92     |
| La       | 0.00  | 99.84  | 0.00    | 0.00   | 99.84     |
| Ce       | 0.00  | 99.73  | 0.00    | 0.18   | 99.91     |
| Pr       | 0.00  | 99.91  | 0.00    | 0.00   | 99.91     |
| Nd       | 0.00  | 99.95  | 0.00    | 0.00   | 99.95     |
| Sm       | 0.00  | 99.35  | 0.00    | 0.45   | 99.8      |
| Eu       | 0.00  | 99.96  | 0.00    | 0.00   | 99.96     |
| Gd       | 0.00  | 99.83  | 0.00    | 0.00   | 99.83     |

---
